# Supplementary material for: Caenorhabditis elegans SWI/SNF Subunits Control Sequential Developmental Stages in the Somatic Gonad
Source: PubMed Central journal article supplement (PMC3962486; doi:10.1534/g3.113.009852), 2014-01-08
Supplement: supp_g3.113.009852_009852SI.pdf [file supp_g3.113.009852_009852SI.pdf]

***Caenorhabditis elegans* SWI/SNF subunits control sequential developmental stages in the somatic gonad**

Edward E. Large\* and Laura D. Mathies\*<sup>§</sup>

\* Department of Genetics, North Carolina State University, Raleigh, NC 27695-7614

<sup>§</sup> Department of Pharmacology and Toxicology, Virginia Commonwealth University, Richmond, VA 23298-0613

Corresponding author:

Laura D. Mathies  
Department of Pharmacology and Toxicology  
1220 East Broad St.  
Richmond, VA 23298-0613  
Phone: (804) 828-2069  
Fax: (804) 828-4794  
Email: [ldmathies@vcu.edu](mailto:ldmathies@vcu.edu)

DOI: [10.1534/g3.113.009852](https://doi.org/10.1534/g3.113.009852)

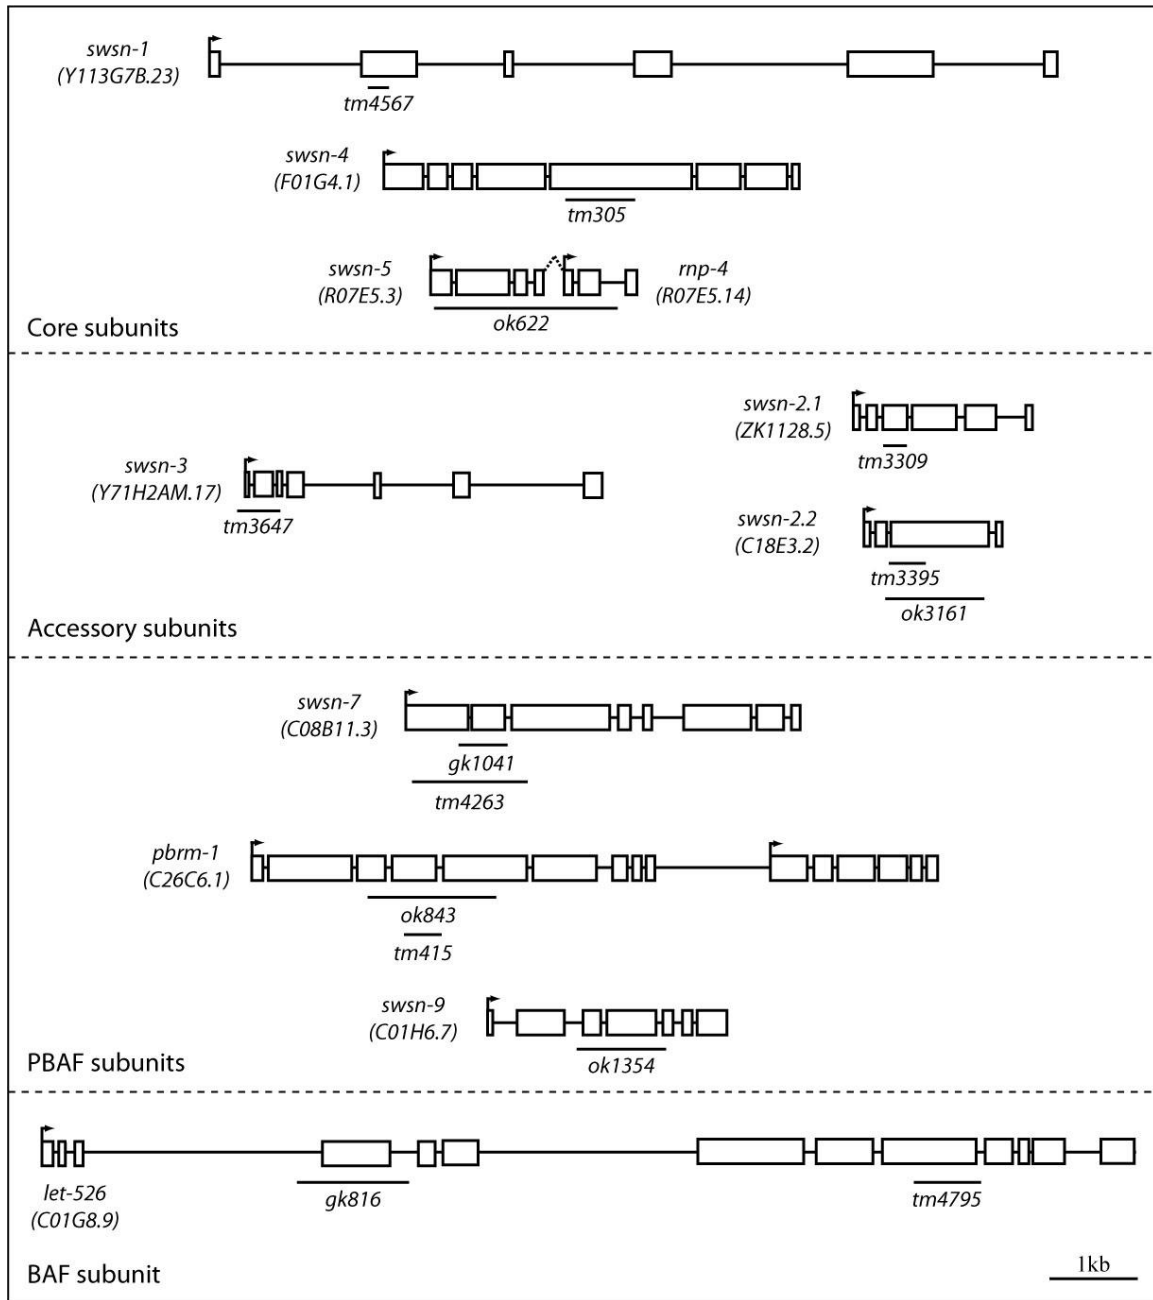

**Figure S1** SWI/SNF deletion alleles. All deletion alleles were PCR amplified and verified by sequencing across the deletion breakpoint (Table S1). The extent of each deletion is indicated on the gene diagrams.

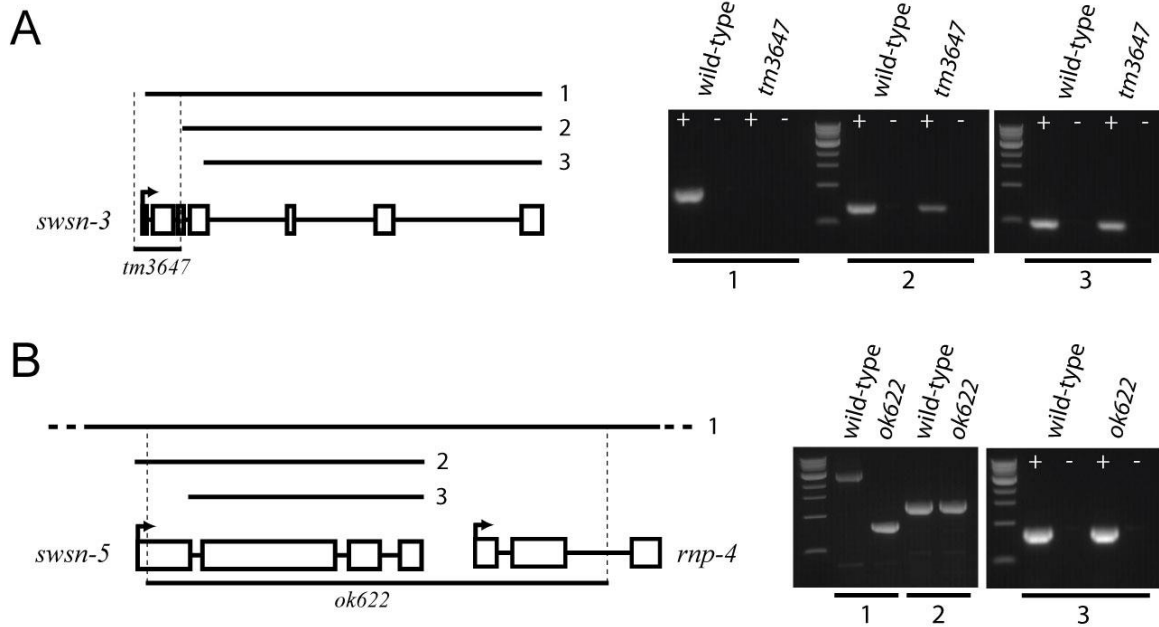

**Figure S2** Molecular analysis of *swsn-3* and *swsn-5* alleles. PCR assays are indicated on gene diagrams and representative gels are shown. Template for RT-PCR was from *tm3647*, *ok622*, or wild-type and reactions with (+) and without (-) reverse transcriptase are indicated. Genomic DNA was from *ok622* and wild-type. Primer sequences are in Table S2. (A) RT-PCR assays were performed using primers RA561/RA562 (not shown), RA1049/RA562 (1), RA1048/RA562 (2), RA1050/RA562 (3). Transcript containing the entire *swsn-3* coding region was not detected (1), but transcripts corresponding to the non-deleted portion of the gene were detected (2, 3) in *swsn-3(tm3647)* homozygotes. (B) PCR from genomic DNA detected the *ok622* deletion (1), but it also detected the entire *swsn-5* coding region (2) and RT-PCR assays detected transcripts corresponding to the locus (2). PCR and RT-PCR assays were performed using primers RA845/846 (1), RA549/RA550 (2) and RA1051/RA550 (3).

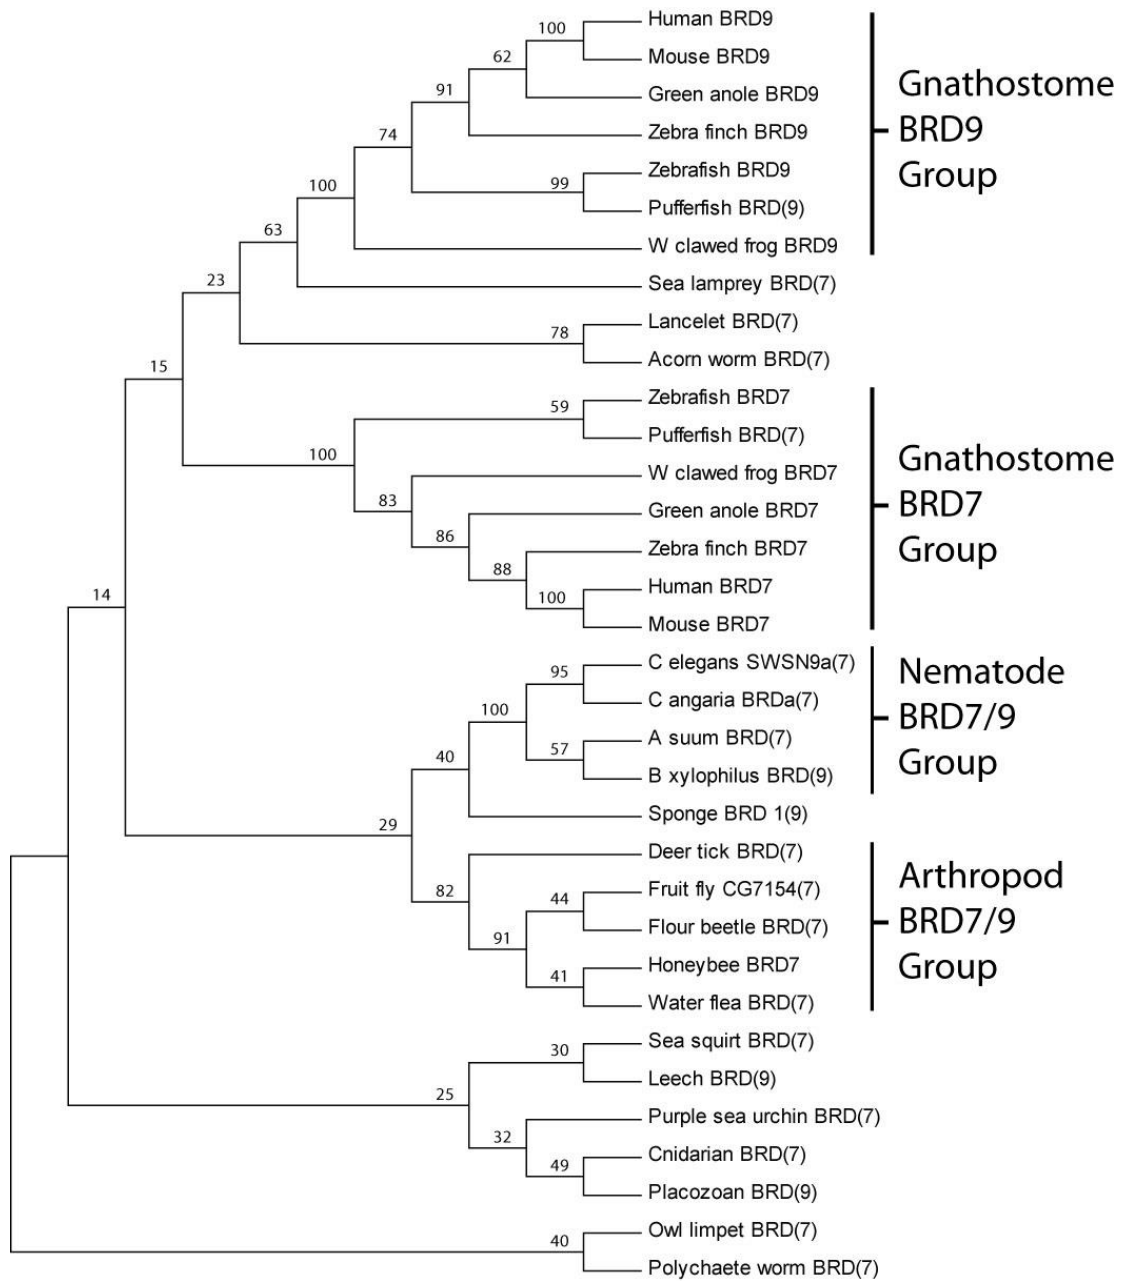

**Figure S3** BRD7/9 Phylogeny. Phylogenetic tree constructed with sequences listed in File S1 using maximum parsimony; bootstrap values are indicated ( $n=100$ ). Similar results were obtained with maximum likelihood. Sequence names indicate the sequence was more similar to human BRD7 (7) or BRD9 (9). Gnathostomes contain distinct BRD7 and BRD9 clades, while Arthropods and Nematodes contain a single BRD7/9 clade.

**Files S1-S2**

Available for download as Excel files at <http://www.g3journal.org/lookup/suppl/doi:10.1534/g3.113.009852/-/DC1>

**File S1** *C. elegans* SWI/SNF homologs and sequence alignments

**File S2** Positives from RNAi Screen

**Table S1 Molecular nature of SWI/SNF deletion alleles**

| Gene           | Sequence relative to wild-type                                      |
|----------------|---------------------------------------------------------------------|
| <i>swn-1</i>   | cactgatctcgacgaagaa --[239 BP DELETION] tctgcgacggcttgcgcc - WT     |
|                | cactgatctcgacgaagaa TC----- tctgcgacggcttgcgcc - <i>tm4567</i>      |
| <i>swn-2.1</i> | caggttcgcaactgggtt ----[241 BP DELETION] gacatattgagttaacac - WT    |
|                | caggttcgcaactgggtt TTTT----- gacatattgagttaacac - <i>tm3309</i>     |
| <i>swn-2.2</i> | ttcatccaaaggttttaattt [418 BP DELETION] cgcacaccacaaccaacg - WT     |
|                | ttcatccaaaggttttaattt ----- cgcacaccacaaccaacg - <i>tm3395</i>      |
| <i>swn-2.2</i> | tatgctgataaatgtattca [1122 BP DELETION] gaggaaggagttcaaagggt - WT   |
|                | tatgctgataaatgtattca ----- gaggaaggagttcaaagggt - <i>ok3161</i>     |
| <i>swn-3</i>   | tttcatttgTTTTTCGTA ---[432 BP DELETION] aaaaaatcgatttaattt - WT     |
|                | tttcatttgTTTTTCGTA AAA----- aaaaaatcgatttaattt - <i>tm3647</i>      |
| <i>swn-4</i>   | gaaggacaaatcagaaaagg [788 BP DELETION] acctccgtttagacggttca - WT    |
|                | gaaggacaaatcagaaaagg ----- acctccgtttagacggttca - <i>tm305</i>      |
| <i>swn-7</i>   | aaattcatttttcaaattat [561 BP DELETION] tgcaaaatcgatttcggttcg - WT   |
|                | aaattcatttttcaaattat ----- tgcaaaatcgatttcggttcg - <i>gk1041</i>    |
| <i>swn-7</i>   | gcaattggtgcagagttgag [1307 BP DELETION] actctccattttcaagtgt - WT    |
|                | gcaattggtgcagagttgag ----- actctccattttcaagtgt - <i>tm4263</i>      |
| <i>swn-9</i>   | ttttcaaaaacaaattttat [1010 BP DELETION] ctcgaaaacaatgaaagaa - WT    |
|                | ttttcaaaaacaaattttat ----- ctcgaaaacaatgaaagaa - <i>ok1354</i>      |
| <i>pbrm-1</i>  | aaaaaccctgtgtcaattt [1584 BP DELETION] caaagcgaatggagtacctt - WT    |
|                | aaaaaccctgtgtcaattt ----- caaagcgaatggagtacctt - <i>ok843</i>       |
| <i>pbrm-1</i>  | gcaatgatgcaagggtt ----[427 BP DELETION] tttctcactgcaaatat - WT      |
|                | gcaatgatgcaagggtt CTCTC----- tttctcactgcaaatat - <i>tm415</i>       |
| <i>let-526</i> | aagcatgaggttgagctcgc [760 BP DELETION] atatctttttcagagaattc - WT    |
|                | aagcatgaggttgagctcgc ----- atatctttttcagagaattc - <i>tm4795</i>     |
| <i>let-526</i> | cacgcggagaatatataga [1268 BP DELETION] tatattatTTTTTCGCATGAC - WT   |
|                | cacgcggagaatatataga ATATA----- tatattatTTTTTCGCATGAC - <i>gk816</i> |

**Table S2 Primers used in this study**

| Name   | Sequence                                |
|--------|-----------------------------------------|
| RA291  | GGCTCGTATGTTGTGTGGAAT                   |
| RA314  | AAGGATCCTTTGTAATTTGGAAGCTGGG            |
| RA549  | caccATGTCGAGCAGCACGAAAAC                |
| RA550  | ATAGTTGAATCCACCGCCAACA                  |
| RA561  | caccATGTCATCTTCCGTCATCCGC               |
| RA562  | TTCTTCATTTTTCTCCGGCT                    |
| RA714  | cgactcactatagggCTGCTGACACAGTTTAATGCTCCT |
| RA715  | cgactcactatagggCTTCTTCATTGGGTCTTCACTATC |
| RA845  | CTACGCGAAACGGATCAAAT                    |
| RA846  | CGTGGATTGGAGAGGACAAT                    |
| RA1048 | ATGATTAATAAAGGACGCGCG                   |
| RA1049 | ACCGGCGAGAAATTTCCAAG                    |
| RA1050 | GATACAAGAACTGTAGTTCCACACC               |
| RA1051 | GCATACTAATATCATGCTGCTGAG                |

**Table S3 SWI/SNF acts alone and in parallel to *ehh-3* during somatic gonad development.**

| Genotype <sup>a</sup>                              | % Gon <sup>b</sup> +/- SD | <i>n</i> |                |
|----------------------------------------------------|---------------------------|----------|----------------|
| <i>swn-1(os22)</i>                                 | 4.0 +/- 0.2               | 579      |                |
| <i>swn-1(ku355)</i>                                | 3.7 +/- 1.2               | 295      |                |
| <i>swn-1(tm4567)/rol-9(sc148)</i>                  | 1.5 +/- 0.9               | 409      |                |
| <i>swn-2.1(tm3309)</i> [m-, z-]                    | 10.7 +/- 2.1              | 327      |                |
| <i>swn-2.2(tm3395)</i> [m-, z-]                    | 9.0 +/- 0.5               | 144      |                |
| <i>swn-2.2(ok3161)</i> [m+, z-]                    | 1.2 +/- 2.3               | 85       |                |
| <i>swn-3(tm3647)</i>                               | 0.0 +/- 0.0               | 576      |                |
| <i>swn-4(os13)</i>                                 | 1.7 +/- 0.7               | 710      |                |
| <i>swn-4(os13)</i> 22.5°                           | 3.6 +/- 3.4               | 140      |                |
| <i>swn-4(tm305)/nT1g</i>                           | 1.1 +/- 0.9               | 447      |                |
| <i>swn-7(gk1041)</i> [m+, z-]                      | 0.9 +/- 0.7               | 218      |                |
| <i>swn-9(ok1354)</i> [m+, z-]                      | 3.7 +/- 3.0               | 54       |                |
| <i>swn-9(ok1354)</i> [m-, z-]                      | 10.3 +/- 4.2              | 331      |                |
| <i>pbrm-1(ok843)/hT2g</i>                          | 0.5 +/- 1.1               | 205      |                |
| <i>pbrm-1(ok843)</i> [m+, z-]                      | 5.9 +/- 5.5               | 136      |                |
| <i>pbrm-1(ok843)</i> [m-, z-]                      | 25.4 +/- 6.6              | 228      |                |
| <i>pbrm-1(tm415)</i> [m-, z-]                      | 14.7 +/- 1.8              | 739      |                |
| <i>let-526(h185)/hT2g<sup>d</sup></i>              | 0.0 +/- 0.0               | 332      |                |
| <i>let-526(tm4795)/hT2g</i>                        | 0.0 +/- 0.0               | 162      |                |
| Genotype <sup>a</sup>                              | % Gon <sup>b</sup> +/- SD | <i>n</i> | p <sup>c</sup> |
| <i>ehh-3(rd2)</i>                                  | 22.0 +/- 2.7              | 441      |                |
| <i>ehh-3(rd2); swn-1(os22)</i>                     | 45.8 +/- 14.0             | 236      | *              |
| <i>ehh-3(rd2); swn-1(ku355)</i>                    | 54.4 +/- 3.8              | 406      | ***            |
| <i>swn-2.1(tm3309)</i> [m-, z-]; <i>ehh-3(rd2)</i> | 96.9 +/- 0.5              | 578      | ***            |
| <i>swn-2.2(ok3161)</i> [m+, z-]; <i>ehh-3(rd2)</i> | 57.5 +/- 4.9              | 113      | ***            |
| <i>swn-3(tm3647); ehh-3(rd2)</i>                   | 27.0 +/- 5.8              | 626      | NS             |



|                                                   |              |     |     |
|---------------------------------------------------|--------------|-----|-----|
| <i>swsn-7(gk1041); ehn-3(rd2)</i>                 | 68.6 +/- 2.7 | 258 | *** |
| <i>swsn-9(ok1354)/hT2g; ehn-3(rd2)</i>            | 34.9 +/- 5.1 | 212 | *   |
| <i>swsn-9(ok1354) [m+, z-]; ehn-3(rd2)</i>        | 83.3 +/- 5.2 | 60  | *** |
| <i>swsn-9(ok1354) [m-, z-]; ehn-3(rd2)</i>        | 94.0 +/- 0.7 | 233 | *** |
| <i>pbrm-1(ok843)/hT2g; ehn-3(rd2)</i>             | 50.0 +/- 4.9 | 484 | *** |
| <i>pbrm-1(ok843) [m+, z-]; ehn-3(rd2)</i>         | 82.2 +/- 4.9 | 101 | *** |
| <i>pbrm-1(tm415) [m-, z-]; ehn-3(rd2)</i>         | 96.5 +/- 0.3 | 198 | *** |
| <i>let-526(h185)/hT2g; ehn-3(rd2)<sup>d</sup></i> | 22.4 +/- 7.4 | 361 | NS  |
| <i>let-526(tm4795)/hT2g; ehn-3(rd2)</i>           | 24.9 +/- 2.5 | 365 | NS  |

<sup>a</sup> Maternal [m+ or m-] and zygotic [z+ or z-] contribution is indicated.

<sup>b</sup> Gonadogenesis defects were assessed using a dissecting microscope and the average penetrance and standard deviation (SD) are reported.

<sup>c</sup> Unpaired t-tests were used for statistical comparisons; *ehn-3(rd2)* was compared and the significance is indicated (NS=not significant, p≤0.05\*, p≤0.01\*\*, p≤0.001\*\*\*).

<sup>d</sup> *let-526(h185)* is linked to *dpy-5(e61) unc-13(e450)*

**Table S4 Qualitative differences between *ehn-3* and *ehn-3; swsn* double mutants**

| Genotype                                            | Percentage of Animals <sup>a</sup> |         |         | <i>n</i> |
|-----------------------------------------------------|------------------------------------|---------|---------|----------|
|                                                     | Two arms                           | One arm | No arms |          |
| <i>swsn-1(os22)</i>                                 | 96.0                               | 4.0     | 0       | 579      |
| <i>swsn-1(ku355)</i>                                | 96.3                               | 3.7     | 0       | 295      |
| <i>swsn-2.1(tm3309)</i> [m-, z-]                    | 89.3                               | 7.9     | 2.8     | 327      |
| <i>swsn-2.2(ok3161)</i> [m+, z-]                    | 98.8                               | 1.2     | 0       | 85       |
| <i>swsn-7(gk1041)</i>                               | 99.1                               | 0.9     | 0       | 218      |
| <i>swsn-9(ok1354)</i> [m-, z-]                      | 89.7                               | 9.4     | 0.9     | 331      |
| <i>pbrm-1(ok843)</i> [m+, z-]                       | 94.1                               | 5.9     | 0       | 136      |
| <i>pbrm-1(tm415)</i> [m-, z-]                       | 85.3                               | 14.1    | 0.7     | 739      |
| <i>ehn-3(rd2)</i>                                   | 78.0                               | 20.9    | 1.1     | 441      |
| <i>ehn-3(rd2); swsn-1(os22)</i>                     | 54.2                               | 39.0    | 6.8     | 236      |
| <i>ehn-3(rd2); swsn-1(ku355)</i>                    | 45.6                               | 34.0    | 20.4    | 406      |
| <i>swsn-2.1(tm3309)</i> [m-, z-]; <i>ehn-3(rd2)</i> | 3.1                                | 10.9    | 86.0    | 578      |
| <i>swsn-2.2(ok3161)</i> [m+, z-]; <i>ehn-3(rd2)</i> | 42.5                               | 43.4    | 13.3    | 113      |
| <i>swsn-7(gk1041); ehn-3(rd2)</i>                   | 31.4                               | 47.7    | 20.9    | 258      |
| <i>swsn-9(ok1354)</i> [m-, z-]; <i>ehn-3(rd2)</i>   | 6.0                                | 30.1    | 63.9    | 233      |
| <i>pbrm-1(ok843)</i> [m+, z-]; <i>ehn-3(rd2)</i>    | 17.8                               | 55.4    | 26.7    | 101      |
| <i>pbrm-1(tm415)</i> [m-, z-]; <i>ehn-3(rd2)</i>    | 3.5                                | 20.2    | 76.3    | 198      |

<sup>a</sup> Gonadogenesis defects were assessed using a dissecting microscope. The percentage of animals with two gonadal arms, one gonadal arm, or no gonadal arms (including unextended and severely reduced gonads) is reported.

**Table S5 Tissue-specific RNAi of BAF and PBAF subunits**

| RNAi           | Genotype                           | % Gon <sup>a</sup> +/- SD | <i>n</i> |
|----------------|------------------------------------|---------------------------|----------|
| none           | wild-type                          | 0                         | >200     |
|                | <i>hnd-1::rde-1</i> <sup>b</sup>   | 0 +/- 0                   | 184      |
| <i>swn-4</i>   | wild-type                          | Emb                       | 169      |
|                | <i>hnd-1::rde-1</i> <sup>b</sup>   | 99.0 +/- 1.1              | 99       |
| <i>pbrm-1</i>  | wild-type                          | Lvl                       | 105      |
|                | <i>hnd-1::rde-1</i> <sup>b,c</sup> | 10.2 +/- 3.3              | 137      |
| <i>let-526</i> | wild-type                          | Emb                       | 78       |
|                | <i>hnd-1::rde-1</i> <sup>b</sup>   | 100 +/- 0                 | 379      |

<sup>a</sup> Gonadogenesis defects were assessed using a dissecting microscope. The average penetrance and standard deviation (SD) are reported. Embryonic (Emb) or Larval (Lvl) lethality is indicated.

<sup>b</sup> genotype is *unc-119(ed3); rde-1(ne219); rdl5 [hnd-1::rde-1]*

<sup>c</sup> also includes *ccls4444 [arg-1::GFP]*
