# Supplementary material for: Caenorhabditis elegans SWI/SNF Subunits Control Sequential Developmental Stages in the Somatic Gonad
Source: PubMed Central journal article supplement (PMC3962486; doi:10.1534/g3.113.009852), 2014-01-08
Supplement: supp_g3.113.009852_FigureS1.pdf [file supp_g3.113.009852_FigureS1.pdf]

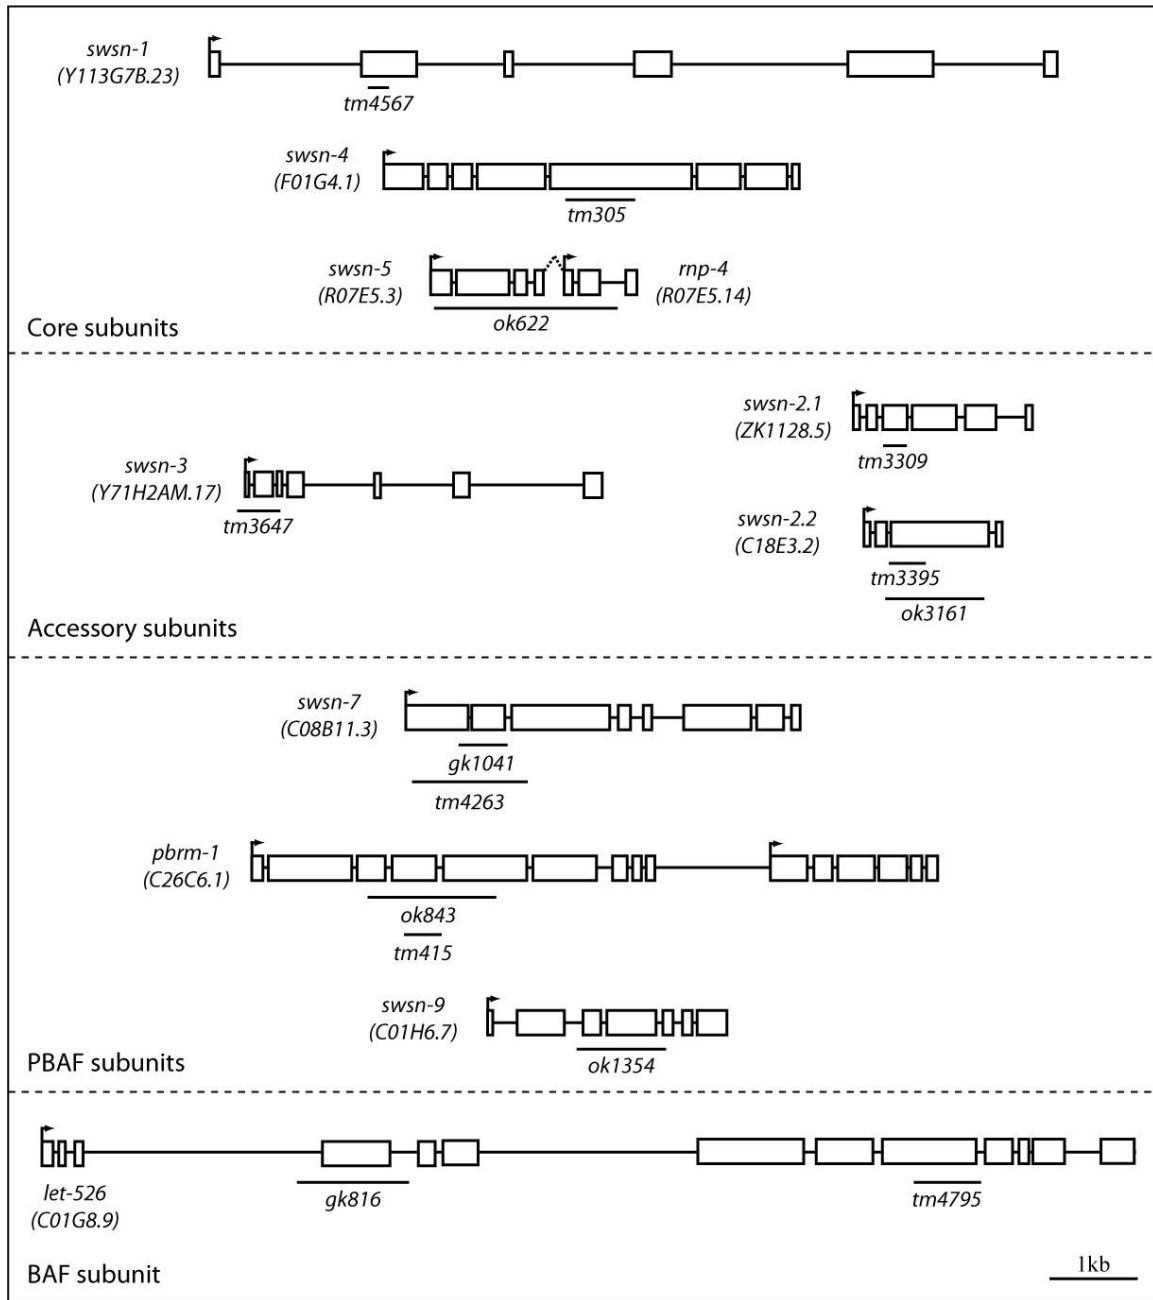

**Figure S1** SWI/SNF deletion alleles. All deletion alleles were PCR amplified and verified by sequencing across the deletion breakpoint (Table S1). The extent of each deletion is indicated on the gene diagrams.
