# Supplementary material for: Caenorhabditis elegans SWI/SNF Subunits Control Sequential Developmental Stages in the Somatic Gonad
Source: PubMed Central journal article supplement (PMC3962486; doi:10.1534/g3.113.009852), 2014-01-08
Supplement: supp_g3.113.009852_TableS1.pdf [file supp_g3.113.009852_TableS1.pdf]

**Table S1 Molecular nature of SWI/SNF deletion alleles**

| Gene           | Sequence relative to wild-type                                      |
|----------------|---------------------------------------------------------------------|
| <i>swn-1</i>   | cactgatctcgacgaagaa --[239 BP DELETION] tctgcgacggcttgcgcc - WT     |
|                | cactgatctcgacgaagaa TC----- tctgcgacggcttgcgcc - <i>tm4567</i>      |
| <i>swn-2.1</i> | caggttcgcaactgggtt ----[241 BP DELETION] gacatattgagttaacac - WT    |
|                | caggttcgcaactgggtt TTTT----- gacatattgagttaacac - <i>tm3309</i>     |
| <i>swn-2.2</i> | ttcatccaaaggttttaattt [418 BP DELETION] cgcacaccacaaccaacg - WT     |
|                | ttcatccaaaggttttaattt ----- cgcacaccacaaccaacg - <i>tm3395</i>      |
| <i>swn-2.2</i> | tatgCGgataaatgtattca [1122 BP DELETION] gaggaaggagttcaaagggt - WT   |
|                | tatgCGgataaatgtattca ----- gaggaaggagttcaaagggt - <i>ok3161</i>     |
| <i>swn-3</i>   | tttcatttgTTTTtcgta ---[432 BP DELETION] aaaaaatcgatttaattt - WT     |
|                | tttcatttgTTTTtcgta AAA----- aaaaaatcgatttaattt - <i>tm3647</i>      |
| <i>swn-4</i>   | gaaggacaaatcagaaaagg [788 BP DELETION] acctccgtttagacggttca - WT    |
|                | gaaggacaaatcagaaaagg ----- acctccgtttagacggttca - <i>tm305</i>      |
| <i>swn-7</i>   | aaattcatttttcaaattat [561 BP DELETION] tgcaaaatcgatttcggttcg - WT   |
|                | aaattcatttttcaaattat ----- tgcaaaatcgatttcggttcg - <i>gk1041</i>    |
| <i>swn-7</i>   | gcaattggtgcagagttgag [1307 BP DELETION] actctccattttcaagtgt - WT    |
|                | gcaattggtgcagagttgag ----- actctccattttcaagtgt - <i>tm4263</i>      |
| <i>swn-9</i>   | ttttcaaaaacaaattttat [1010 BP DELETION] ctcgaaaacaatgaaagaa - WT    |
|                | ttttcaaaaacaaattttat ----- ctcgaaaacaatgaaagaa - <i>ok1354</i>      |
| <i>pbrm-1</i>  | aaaaaccctgtgtcaattt [1584 BP DELETION] caaagcgaatggagtacctt - WT    |
|                | aaaaaccctgtgtcaattt ----- caaagcgaatggagtacctt - <i>ok843</i>       |
| <i>pbrm-1</i>  | gcaatgatgcaagggtt ----[427 BP DELETION] tttctcactgcaaatat - WT      |
|                | gcaatgatgcaagggtt CTCTC----- tttctcactgcaaatat - <i>tm415</i>       |
| <i>let-526</i> | aagcatgaggttgagctcgc [760 BP DELETION] atatctttttcagagaattc - WT    |
|                | aagcatgaggttgagctcgc ----- atatctttttcagagaattc - <i>tm4795</i>     |
| <i>let-526</i> | cacgCGgagaatatataga [1268 BP DELETION] tatattatTTTTcgcgatgac - WT   |
|                | cacgCGgagaatatataga ATATA----- tatattatTTTTcgcgatgac - <i>gk816</i> |
