# Supplementary material for: Caenorhabditis elegans SWI/SNF Subunits Control Sequential Developmental Stages in the Somatic Gonad
Source: PubMed Central journal article supplement (PMC3962486; doi:10.1534/g3.113.009852), 2014-01-08
Supplement: supp_g3.113.009852_TableS2.pdf [file supp_g3.113.009852_TableS2.pdf]

**Table S2 Primers used in this study**

| Name   | Sequence                                 |
|--------|------------------------------------------|
| RA291  | GGCTCGTATGTTGTGTGGAAT                    |
| RA314  | AAGGATCCTTTGTAATTTGGAAGCTGGG             |
| RA549  | caccATGTCGAGCAGCACGAAAAC                 |
| RA550  | ATAGTTGAATCCACCGCCAACA                   |
| RA561  | caccATGTCATCTTTCCGTCATCCGC               |
| RA562  | TTCTTCCATTTTTTCTCCGGCT                   |
| RA714  | cgactcactatagggCTGCTGACACAGTTTAATGCTCCT  |
| RA715  | cgactcactatagggCTTCTTCCATTGGGTCTTCACTATC |
| RA845  | CTACGCGAAACGGATCAAAT                     |
| RA846  | CGTGGATTGGAGAGGACAAT                     |
| RA1048 | ATGATTAATAAAGGACGCGCG                    |
| RA1049 | ACCGGCGAGAAATTTCCAAG                     |
| RA1050 | GATACAAGAACTGTAGTTCCACACC                |
| RA1051 | GCATACTAATATCATGCTGCTGAG                 |
