# Supplementary material for: Caenorhabditis elegans SWI/SNF Subunits Control Sequential Developmental Stages in the Somatic Gonad
Source: PubMed Central journal article supplement (PMC3962486; doi:10.1534/g3.113.009852), 2014-01-08
Supplement: supp_g3.113.009852_TableS3.pdf [file supp_g3.113.009852_TableS3.pdf]

**Table S3 SWI/SNF acts alone and in parallel to *ehh-3* during somatic gonad development.**

| Genotype <sup>a</sup>                       | % Gon <sup>b</sup> +/- SD | <i>n</i> |                |
|---------------------------------------------|---------------------------|----------|----------------|
| <i>swn-1(os22)</i>                          | 4.0 +/- 0.2               | 579      |                |
| <i>swn-1(ku355)</i>                         | 3.7 +/- 1.2               | 295      |                |
| <i>swn-1(tm4567)/rol-9(sc148)</i>           | 1.5 +/- 0.9               | 409      |                |
| <i>swn-2.1(tm3309) [m-, z-]</i>             | 10.7 +/- 2.1              | 327      |                |
| <i>swn-2.2(tm3395) [m-, z-]</i>             | 9.0 +/- 0.5               | 144      |                |
| <i>swn-2.2(ok3161) [m+, z-]</i>             | 1.2 +/- 2.3               | 85       |                |
| <i>swn-3(tm3647)</i>                        | 0.0 +/- 0.0               | 576      |                |
| <i>swn-4(os13)</i>                          | 1.7 +/- 0.7               | 710      |                |
| <i>swn-4(os13) 22.5°</i>                    | 3.6 +/- 3.4               | 140      |                |
| <i>swn-4(tm305)/nT1g</i>                    | 1.1 +/- 0.9               | 447      |                |
| <i>swn-7(gk1041) [m+, z-]</i>               | 0.9 +/- 0.7               | 218      |                |
| <i>swn-9(ok1354) [m+, z-]</i>               | 3.7 +/- 3.0               | 54       |                |
| <i>swn-9(ok1354) [m-, z-]</i>               | 10.3 +/- 4.2              | 331      |                |
| <i>pbrm-1(ok843)/hT2g</i>                   | 0.5 +/- 1.1               | 205      |                |
| <i>pbrm-1(ok843) [m+, z-]</i>               | 5.9 +/- 5.5               | 136      |                |
| <i>pbrm-1(ok843) [m-, z-]</i>               | 25.4 +/- 6.6              | 228      |                |
| <i>pbrm-1(tm415) [m-, z-]</i>               | 14.7 +/- 1.8              | 739      |                |
| <i>let-526(h185)/hT2g<sup>d</sup></i>       | 0.0 +/- 0.0               | 332      |                |
| <i>let-526(tm4795)/hT2g</i>                 | 0.0 +/- 0.0               | 162      |                |
| Genotype <sup>a</sup>                       | % Gon <sup>b</sup> +/- SD | <i>n</i> | p <sup>c</sup> |
| <i>ehh-3(rd2)</i>                           | 22.0 +/- 2.7              | 441      |                |
| <i>ehh-3(rd2); swn-1(os22)</i>              | 45.8 +/- 14.0             | 236      | *              |
| <i>ehh-3(rd2); swn-1(ku355)</i>             | 54.4 +/- 3.8              | 406      | ***            |
| <i>swn-2.1(tm3309) [m-, z-]; ehh-3(rd2)</i> | 96.9 +/- 0.5              | 578      | ***            |
| <i>swn-2.2(ok3161) [m+, z-]; ehh-3(rd2)</i> | 57.5 +/- 4.9              | 113      | ***            |
| <i>swn-3(tm3647); ehh-3(rd2)</i>            | 27.0 +/- 5.8              | 626      | NS             |

|                                                   |              |     |     |
|---------------------------------------------------|--------------|-----|-----|
| <i>swsn-7(gk1041); ehn-3(rd2)</i>                 | 68.6 +/- 2.7 | 258 | *** |
| <i>swsn-9(ok1354)/hT2g; ehn-3(rd2)</i>            | 34.9 +/- 5.1 | 212 | *   |
| <i>swsn-9(ok1354) [m+, z-]; ehn-3(rd2)</i>        | 83.3 +/- 5.2 | 60  | *** |
| <i>swsn-9(ok1354) [m-, z-]; ehn-3(rd2)</i>        | 94.0 +/- 0.7 | 233 | *** |
| <i>pbrm-1(ok843)/hT2g; ehn-3(rd2)</i>             | 50.0 +/- 4.9 | 484 | *** |
| <i>pbrm-1(ok843) [m+, z-]; ehn-3(rd2)</i>         | 82.2 +/- 4.9 | 101 | *** |
| <i>pbrm-1(tm415) [m-, z-]; ehn-3(rd2)</i>         | 96.5 +/- 0.3 | 198 | *** |
| <i>let-526(h185)/hT2g; ehn-3(rd2)<sup>d</sup></i> | 22.4 +/- 7.4 | 361 | NS  |
| <i>let-526(tm4795)/hT2g; ehn-3(rd2)</i>           | 24.9 +/- 2.5 | 365 | NS  |

---

<sup>a</sup> Maternal [m+ or m-] and zygotic [z+ or z-] contribution is indicated.

<sup>b</sup> Gonadogenesis defects were assessed using a dissecting microscope and the average penetrance and standard deviation (SD) are reported.

<sup>c</sup> Unpaired t-tests were used for statistical comparisons; *ehn-3(rd2)* was compared and the significance is indicated (NS=not significant, p≤0.05\*, p≤0.01\*\*, p≤0.001\*\*\*).

<sup>d</sup> *let-526(h185)* is linked to *dpy-5(e61) unc-13(e450)*
