# Supplementary material for: Caenorhabditis elegans SWI/SNF Subunits Control Sequential Developmental Stages in the Somatic Gonad
Source: PubMed Central journal article supplement (PMC3962486; doi:10.1534/g3.113.009852), 2014-01-08
Supplement: supp_g3.113.009852_TableS4.pdf [file supp_g3.113.009852_TableS4.pdf]

**Table S4 Qualitative differences between *ehn-3* and *ehn-3; swsn* double mutants**

| Genotype                                            | Percentage of Animals <sup>a</sup> |         |         | <i>n</i> |
|-----------------------------------------------------|------------------------------------|---------|---------|----------|
|                                                     | Two arms                           | One arm | No arms |          |
| <i>swsn-1(os22)</i>                                 | 96.0                               | 4.0     | 0       | 579      |
| <i>swsn-1(ku355)</i>                                | 96.3                               | 3.7     | 0       | 295      |
| <i>swsn-2.1(tm3309)</i> [m-, z-]                    | 89.3                               | 7.9     | 2.8     | 327      |
| <i>swsn-2.2(ok3161)</i> [m+, z-]                    | 98.8                               | 1.2     | 0       | 85       |
| <i>swsn-7(gk1041)</i>                               | 99.1                               | 0.9     | 0       | 218      |
| <i>swsn-9(ok1354)</i> [m-, z-]                      | 89.7                               | 9.4     | 0.9     | 331      |
| <i>pbrm-1(ok843)</i> [m+, z-]                       | 94.1                               | 5.9     | 0       | 136      |
| <i>pbrm-1(tm415)</i> [m-, z-]                       | 85.3                               | 14.1    | 0.7     | 739      |
| <i>ehn-3(rd2)</i>                                   | 78.0                               | 20.9    | 1.1     | 441      |
| <i>ehn-3(rd2); swsn-1(os22)</i>                     | 54.2                               | 39.0    | 6.8     | 236      |
| <i>ehn-3(rd2); swsn-1(ku355)</i>                    | 45.6                               | 34.0    | 20.4    | 406      |
| <i>swsn-2.1(tm3309)</i> [m-, z-]; <i>ehn-3(rd2)</i> | 3.1                                | 10.9    | 86.0    | 578      |
| <i>swsn-2.2(ok3161)</i> [m+, z-]; <i>ehn-3(rd2)</i> | 42.5                               | 43.4    | 13.3    | 113      |
| <i>swsn-7(gk1041); ehn-3(rd2)</i>                   | 31.4                               | 47.7    | 20.9    | 258      |
| <i>swsn-9(ok1354)</i> [m-, z-]; <i>ehn-3(rd2)</i>   | 6.0                                | 30.1    | 63.9    | 233      |
| <i>pbrm-1(ok843)</i> [m+, z-]; <i>ehn-3(rd2)</i>    | 17.8                               | 55.4    | 26.7    | 101      |
| <i>pbrm-1(tm415)</i> [m-, z-]; <i>ehn-3(rd2)</i>    | 3.5                                | 20.2    | 76.3    | 198      |

<sup>a</sup> Gonadogenesis defects were assessed using a dissecting microscope. The percentage of animals with two gonadal arms, one gonadal arm, or no gonadal arms (including unextended and severely reduced gonads) is reported.
