# Supplementary material for: Caenorhabditis elegans SWI/SNF Subunits Control Sequential Developmental Stages in the Somatic Gonad
Source: PubMed Central journal article supplement (PMC3962486; doi:10.1534/g3.113.009852), 2014-01-08
Supplement: supp_g3.113.009852_TableS5.pdf [file supp_g3.113.009852_TableS5.pdf]

**Table S5 Tissue-specific RNAi of BAF and PBAF subunits**

| RNAi           | Genotype                           | % Gon <sup>a</sup> +/- SD | <i>n</i> |
|----------------|------------------------------------|---------------------------|----------|
| none           | wild-type                          | 0                         | >200     |
|                | <i>hnd-1::rde-1</i> <sup>b</sup>   | 0 +/- 0                   | 184      |
| <i>swn-4</i>   | wild-type                          | Emb                       | 169      |
|                | <i>hnd-1::rde-1</i> <sup>b</sup>   | 99.0 +/- 1.1              | 99       |
| <i>pbrm-1</i>  | wild-type                          | Lvl                       | 105      |
|                | <i>hnd-1::rde-1</i> <sup>b,c</sup> | 10.2 +/- 3.3              | 137      |
| <i>let-526</i> | wild-type                          | Emb                       | 78       |
|                | <i>hnd-1::rde-1</i> <sup>b</sup>   | 100 +/- 0                 | 379      |

<sup>a</sup> Gonadogenesis defects were assessed using a dissecting microscope. The average penetrance and standard deviation (SD) are reported. Embryonic (Emb) or Larval (Lvl) lethality is indicated.

<sup>b</sup> genotype is *unc-119(ed3); rde-1(ne219); rdl7 [hnd-1::rde-1]*

<sup>c</sup> also includes *ccls4444 [arg-1::GFP]*
